# Supplementary material
Source: PubMed Central journal article supplement (PMC9941972)
Supplement: jamaneurol-e225416-s001.pdf [file jamaneurol-e225416-s001.pdf]

## Supplemental Online Content

Grodstein F, Leurgans SE, Capuano AW, Schneider JA, Bennett DA. Trends in postmortem neurodegenerative and cerebrovascular neuropathologies over 25 years. *JAMA Neurol*. Published online February 20, 2023. doi:10.1001/jamaneurol.2022.5416

**eFigure.** Distributions of Age at Death across Four Birth Epochs: Religious Orders Study and Rush Memory and Aging Project

This supplemental material has been provided by the authors to give readers additional information about their work.

**eFigure.** Distributions of Age at Death across Four Birth Epochs: Religious Orders Study and Rush Memory and Aging Project<sup>a,b</sup>

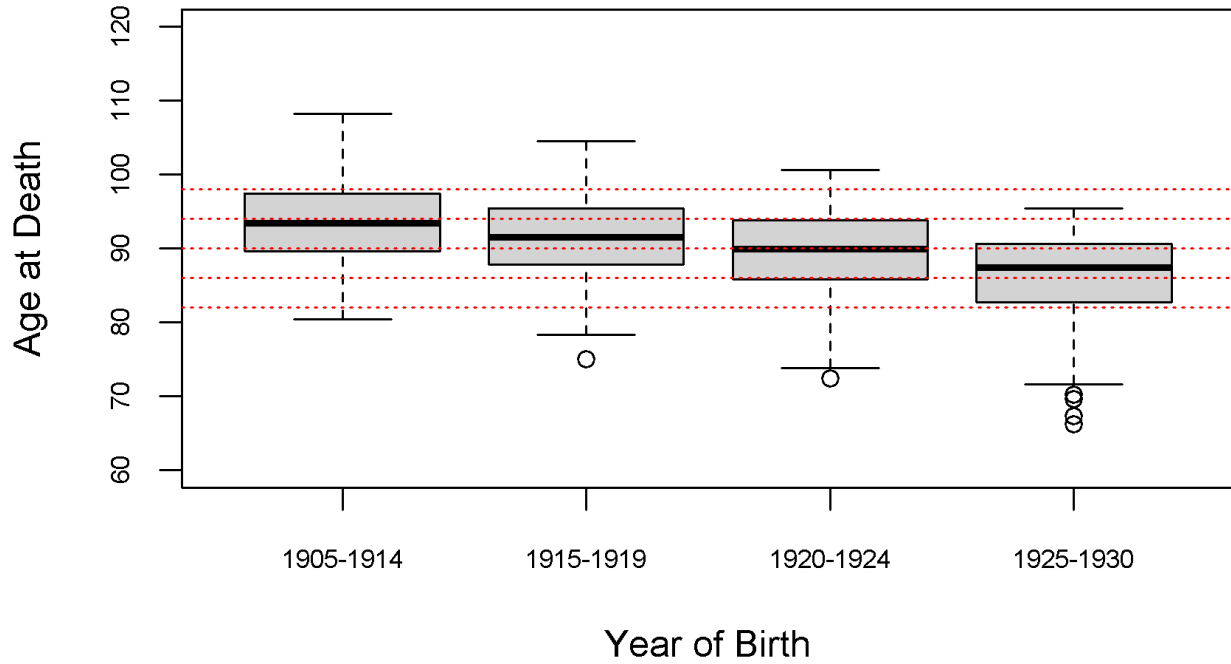

<sup>a</sup> Red lines denote the 6 categories of age used for age-standardization (<82 years, 82-85, 86-89, 90-93, 94-97, 98+ years). This figure demonstrates that there is adequate overlap in age categories across the birth epochs to enable control for age.

<sup>b</sup> 1905-14, n=374; 1915-19, n=360; 1920-24, n=466; 1925-30, n=354
