# Supplementary material
Source: PubMed Central journal article supplement (PMC9941972)
Supplement: jamaneurol-e225416-s002.pdf [file jamaneurol-e225416-s002.pdf]

## Data Sharing Statement

Grodstein. Trends in Postmortem Neurodegenerative and Cerebrovascular Neuropathologies Over 25 Years. *JAMA Neurol.* Published February 20, 2023.

doi:10.1001/jamaneurol.2022.5416

### Data

**Data available:** Yes

**Data types:** Participant data with identifiers

**How to access data:** All data presented can be requested at <https://www.radc.rush.edu>.

**When available:** With publication

### Supporting Documents

**Document types:** None

### Additional Information

**Who can access the data:** Data will be made available to researchers whose proposed use of the data has been approved.

**Types of analyses:** Data will be made available for analyses with a specified purpose.

**Mechanisms of data availability:** Data will be made available after approval of a proposal, with a signed data use agreement.
